# Supplementary material for: Discovery, Antitumor Activity, and Fermentation Optimization of Roquefortines from Penicillium sp. OUCMDZ-1435
Source: MDPI journal article supplement (doi:10.3390/molecules28073180), 2023-04-03
Supplement: s1 [file s1]

## Supporting Information

# Discovery, Antitumor Activity and Fermentation Optimization of Roquefortines from Marine-derived Fungi

Xingxing He <sup>1†</sup>, Yanzheng Jin <sup>1†</sup>, Fei Kong <sup>1†</sup>, Liyuan Yang <sup>1</sup>, Mingzhuang Zhu <sup>2</sup> and Yi Wang <sup>1,\*</sup>

### List of Supporting Information

|                                                                                                                                                                               |           |
|-------------------------------------------------------------------------------------------------------------------------------------------------------------------------------|-----------|
| <b>Figure S1.</b> Phylogenetic relationship based on ITS rDNA gene sequences using the neighbor-joining method. ....                                                          | <b>S2</b> |
| <b>Figure S2.</b> The biosynthetic pathway of diketopiperazine alkaloids .....                                                                                                | <b>S2</b> |
| <b>Figure S3.</b> <sup>1</sup> H(400MHz)-NMR spectrum of compound 1 in DMSO .....                                                                                             | <b>S3</b> |
| <b>Figure S4.</b> <sup>13</sup> C(125MHz)-NMR spectrum of compound 1 in DMSO .....                                                                                            | <b>S3</b> |
| <b>Figure S5.</b> <sup>1</sup> H(500MHz)-NMR spectrum of compound 2 in DMSO.....                                                                                              | <b>S4</b> |
| <b>Figure S6.</b> <sup>13</sup> C(125MHz)-NMR spectrum of compound 2 in DMSO .....                                                                                            | <b>S4</b> |
| <b>Table S1.</b> <sup>1</sup> H and <sup>13</sup> C NMR Data for Compounds 1 and 2 ( <sup>1</sup> H 500MHz, <sup>13</sup> C 150 MHz, DMSO-d <sub>6</sub> , TMS, δ ppm ) ..... | <b>S5</b> |

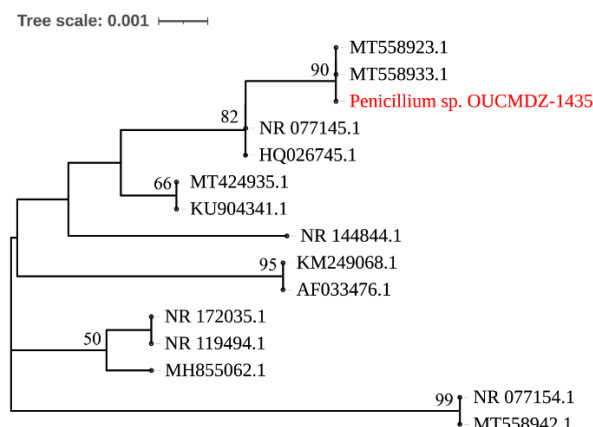

**Figure S1.:** Phylogenetic relationship based on ITS rDNA gene sequences using the neighbor-joining method. The scale bar represents 0.001 substitutions per nucleotide. Strain Number Notes: *Penicillium goetzii* isolate 2010F20 (MT558933.1), *Penicillium rubens* isolate 2010F5 (MT558923.1), *Penicillium chrysogenum* CBS 306.48 (NR\_077145.1), *Penicillium chrysogenum* strain ATCC 10106 (HQ026745.1), *Penicillium fimorum* strain DTO149-B8 (MT424935.1), *Penicillium fimorum* strain CBS 140575 (KU904341.1), *Penicillium compactum* CGMCC 3.15411 (NR\_144844.1), *Penicillium cellarum* isolate F727 (KM249068.1), *Penicillium aurantiogriseum* strain NRRL 971 (AF033476.1), *Penicillium speluncae* DAOMC 251701 (NR\_172035.1), *Penicillium solitum* FRR 937 (NR\_119494.1), *Penicillium fuscoglaucum* culture CBS:261.29 (MH855062.1), *Penicillium expansum* ATCC 7861 (NR\_077154.1), *Penicillium fimorum* isolate 2011F12 (MT558942.1).

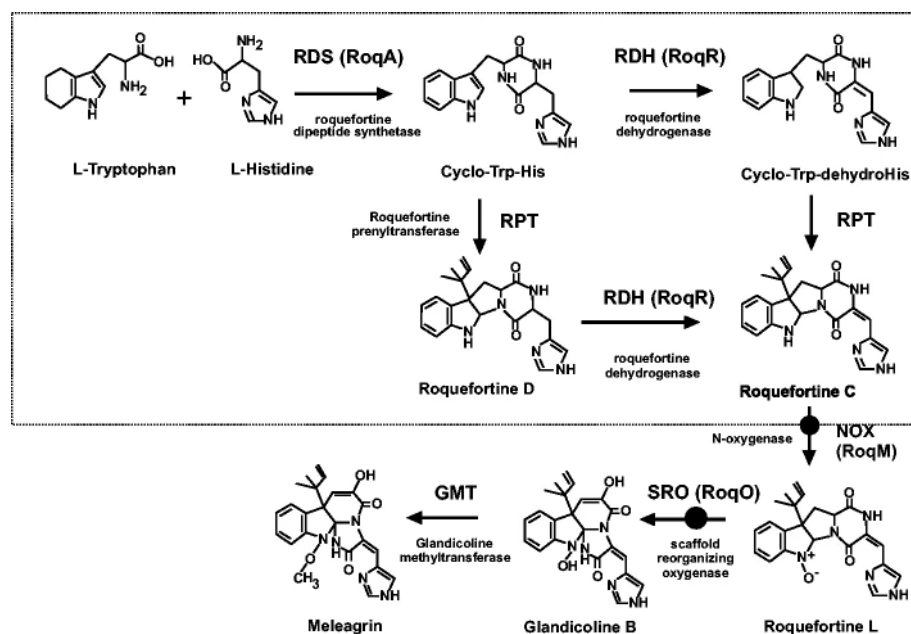

**Figure S2.** The biosynthetic pathway of diketopiperazine alkaloids<sup>1</sup>

<sup>1</sup>Kosalková, K.; Domínguez-Santos, R. A natural short pathway synthesizes roquefortine C but not meleagrins in three different *Penicillium roqueforti* strains. *Appl Microbiol Biot* 2015, 99, 7601-7612.

**Figure S3.**  $^1\text{H}$ (400MHz)-NMR spectrum of compound **1** in DMSO

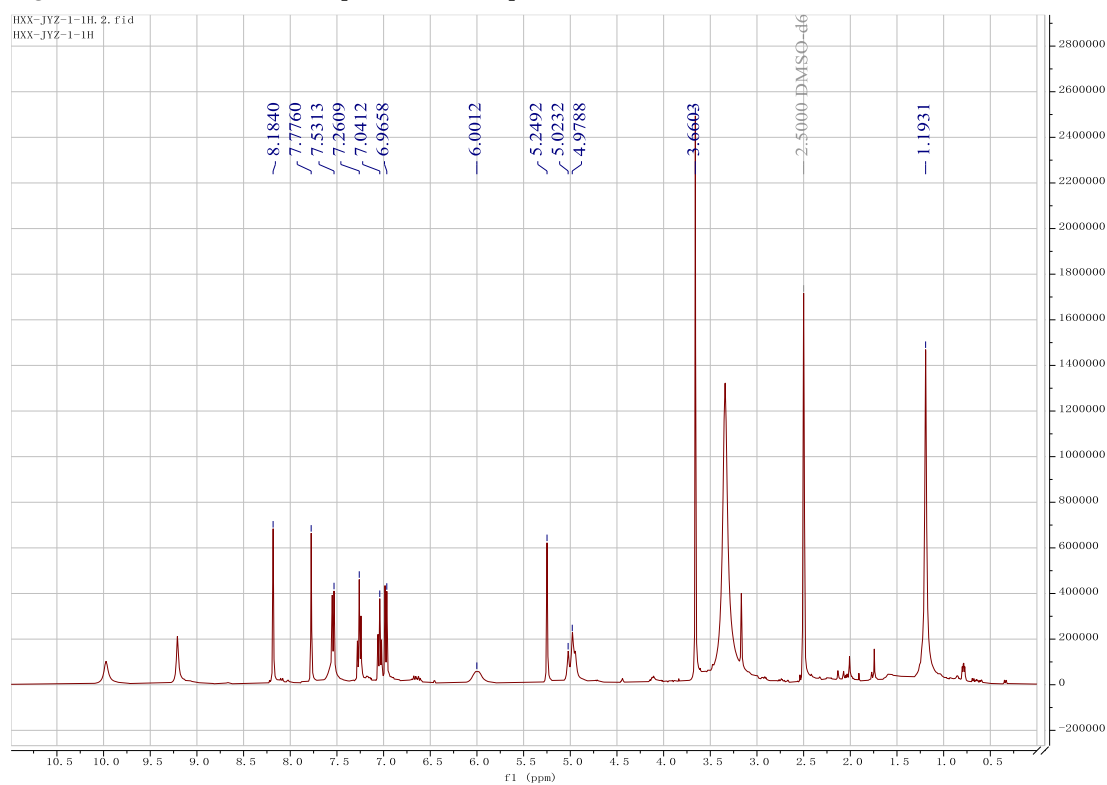

**Figure S4.**  $^{13}\text{C}$ (125MHz)-NMR spectrum of compound **1** in DMSO

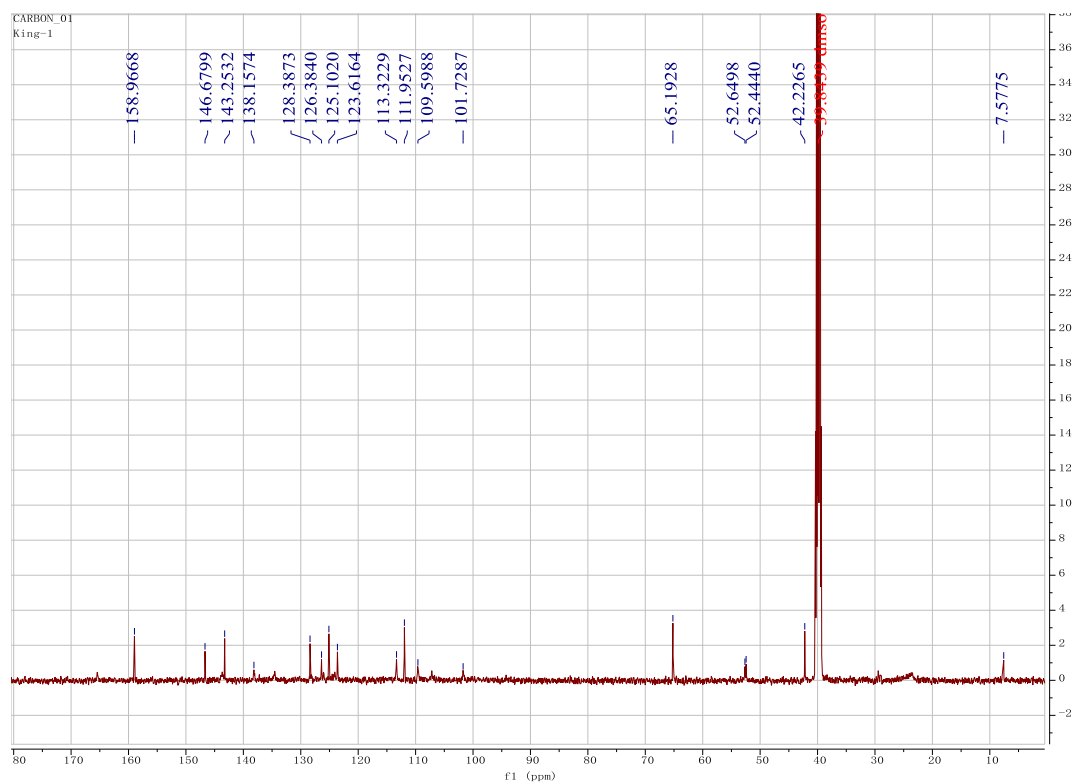

**Figure S5.**  $^1\text{H}$ (500MHz)-NMR spectrum of compound **2** in DMSO

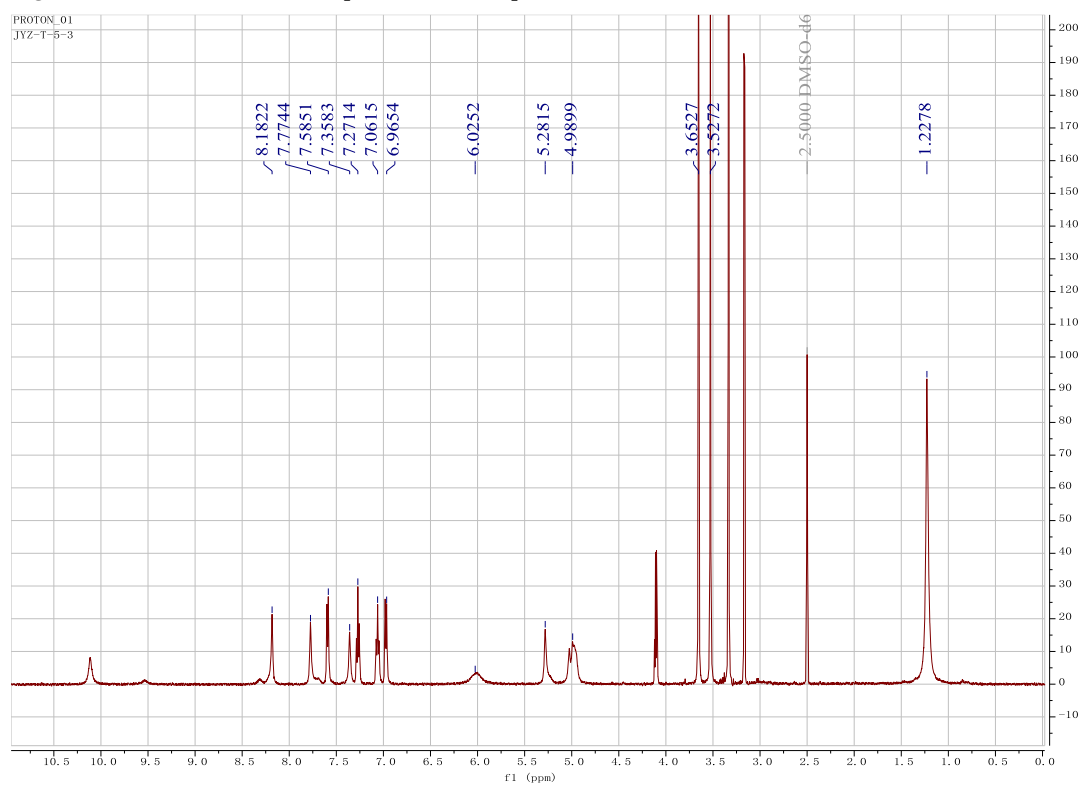

**Figure S6.**  $^{13}\text{C}$ (125MHz)-NMR spectrum of compound **2** in DMSO

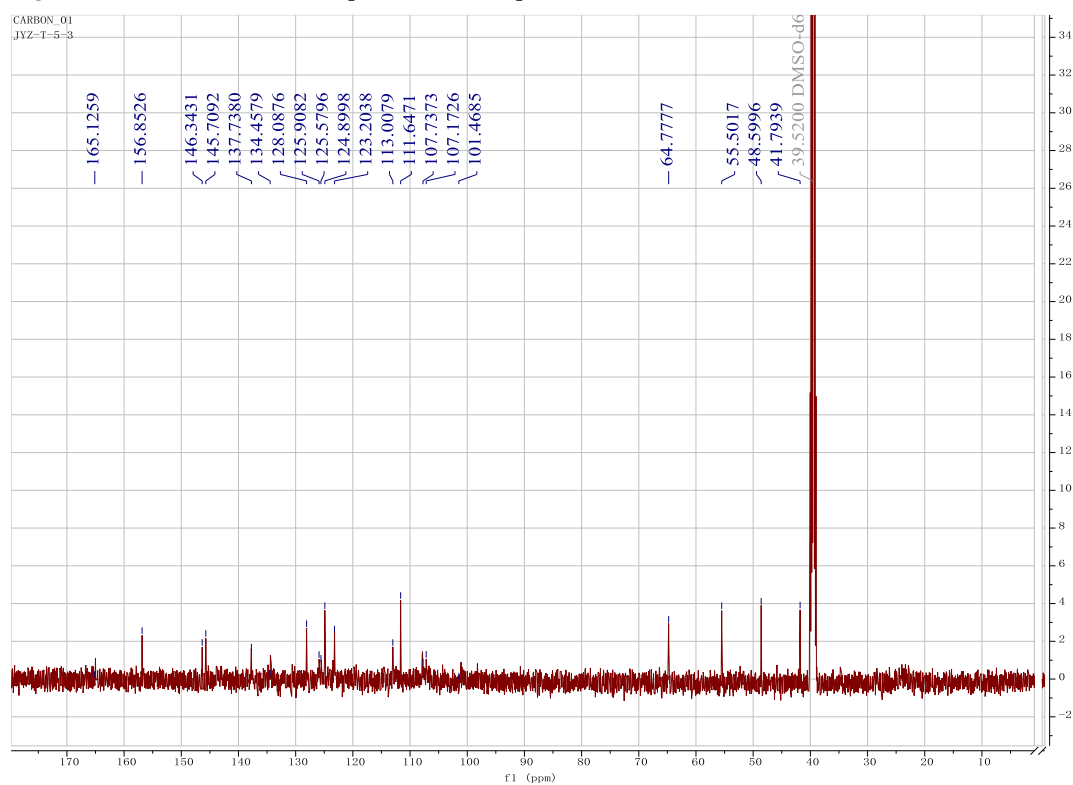

**Table S1.** <sup>1</sup>H and <sup>13</sup>C NMR Data for Compounds **1** and **2** (<sup>1</sup>H 500MHz, <sup>13</sup>C 150 MHz, DMSO-d<sub>6</sub>, TMS, δ ppm)

| Position | Compound 1           |                          | Compound 2           |                          |
|----------|----------------------|--------------------------|----------------------|--------------------------|
|          | δ <sub>C</sub>       | δ <sub>H</sub> (J in Hz) | δ <sub>C</sub>       | δ <sub>H</sub> (J in Hz) |
| 1        |                      | 3.66, s                  |                      | 3.65, s                  |
| 2        | 101.7,C              |                          | 101.1,C              |                          |
| 3        | 52.5,C               |                          | 55.5,C               |                          |
| 4        | 125.1,CH             | 7.53,d                   | 124.9,CH             | 7.59,d                   |
| 4a       | 126.4,C              |                          | 125.5,C              |                          |
| 5        | 123.7,CH             | 7.04,t                   | 123.2,CH             | 7.06,t                   |
| 6        | 128.4,CH             | 7.26,t                   | 128.1,CH             | 7.27,t                   |
| 7        | 111.9,CH             | 6.97, d                  | 111.6,CH             | 6.97, d                  |
| 7a       | 146.6,C              |                          | 146.3,C              |                          |
| 8        | 109.3,CH             | 5.25,s                   | 107.7,CH             | 5.28,s                   |
| 9        | 143.2,CH             |                          | 142.9,C              |                          |
| 9'       |                      |                          | 64.7,CH <sub>3</sub> | 3.53,s                   |
| 10       | 158.9,C              |                          | 158.8,C              |                          |
| 11       |                      |                          |                      |                          |
| 12       | 123.9,C              | 3.82, s                  | 124.8,C              |                          |
| 13       | 165.4,C              |                          | 165.0,C              |                          |
| 14       |                      |                          |                      | 10.11,s                  |
| 15       | 107.2,CH             | 8.18,s                   | 107.1,CH             | 8.18,s                   |
| 16       | 126.3,C              |                          | 125.9,C              |                          |
| 17       |                      |                          |                      |                          |
| 18       | 134.5,CH             | 7.34,s                   | 134.4,CH             | 7.36,s                   |
| 19       |                      |                          |                      |                          |
| 20       | 138.5,CH             | 7.78,s                   | 137.7,CH             | 7.78,s                   |
| 21       | 41.9,C               |                          | 41.8,C               |                          |
| 22       | 143.7,CH             | 6.00                     | 143.8,CH             | 6.01,s                   |
| 23       | 113.3,CH             | 4.98                     | 113.0,CH             | 5.00                     |
|          |                      | 5.02                     |                      | 5.28                     |
| 24       | 23.7,CH <sub>3</sub> | 1.19,s                   | 24.0,CH <sub>3</sub> | 1.23,s                   |
| 25       | 23.7,CH <sub>3</sub> | 1.19,s                   | 24.0,CH <sub>3</sub> | 1.23,s                   |
